# Supplementary material for: Spongiatriol Inhibits Nuclear Factor Kappa B Activation and Induces Apoptosis in Pancreatic Cancer Cells
Source: MDPI journal article supplement (doi:10.3390/md11041140), 2013-04-02
Supplement: s1 [file s1]

marinedrugs-11-01140-s001.mol
  corina  04151404543D 1   1.00000     0.00000 
CORINA 3.49 0023  12.04.2013
 24 27  0  0  0  0  0  0  0  0999 V2000
   -0.1537    1.4008   -0.1161 C   0  0  0  0  0  0  0  0  0  0  0  0
   -0.0728   -0.1078   -0.0747 C   0  0  0  0  0  0  0  0  0  0  0  0
    0.8164   -0.5317    1.1036 C   0  0  0  0  0  0  0  0  0  0  0  0
    2.1230    0.2472    1.1024 C   0  0  0  0  0  0  0  0  0  0  0  0
    1.9336    1.7648    1.1372 C   0  0  0  0  0  0  0  0  0  0  0  0
    1.1503    2.1684   -0.1343 C   0  0  0  0  0  0  0  0  0  0  0  0
    3.0351   -0.2018    2.2424 C   0  0  0  0  0  0  0  0  0  0  0  0
    4.4190    0.4360    2.0741 C   0  0  0  0  0  0  0  0  0  0  0  0
    4.2930    1.9548    2.1225 C   0  0  0  0  0  0  0  0  0  0  0  0
    3.2944    2.4378    1.0790 C   0  0  0  0  0  0  0  0  0  0  0  0
    5.6144    2.6005    1.7587 C   0  0  0  0  0  0  0  0  0  0  0  0
    5.6970    3.7734    0.9643 C   0  0  0  0  0  0  0  0  0  0  0  0
    4.5070    4.4958    0.3852 C   0  0  0  0  0  0  0  0  0  0  0  0
    3.2277    3.9594    1.0545 C   0  0  0  0  0  0  0  0  0  0  0  0
    6.8567    2.2439    2.0767 C   0  0  0  0  0  0  0  0  0  0  0  0
    7.7013    3.1367    1.5233 O   0  0  0  0  0  0  0  0  0  0  0  0
    6.9965    4.0659    0.8492 C   0  0  0  0  0  0  0  0  0  0  0  0
    1.1197    2.2228    2.3415 C   0  0  0  0  0  0  0  0  0  0  0  0
    0.1038   -0.3833    2.3283 O   0  0  0  0  0  0  0  0  0  0  0  0
    1.1208   -2.0311    0.9120 C   0  0  0  0  0  0  0  0  0  0  0  0
    0.4848   -0.5985   -1.2951 O   0  0  0  0  0  0  0  0  0  0  0  0
   -1.2156    1.9718   -0.1388 O   0  0  0  0  0  0  0  0  0  0  0  0
    3.9563    2.4010    3.5445 C   0  0  0  0  0  0  0  0  0  0  0  0
    5.0521    2.0990    4.4106 O   0  0  0  0  0  0  0  0  0  0  0  0
  1  2  1  0      
  2  3  1  0      
  3  4  1  0      
  4  5  1  0      
  5  6  1  0      
  6  1  1  0      
  4  7  1  0      
  7  8  1  0      
  8  9  1  0      
  9 10  1  0      
 10  5  1  0      
  9 11  1  0      
 11 12  1  0      
 12 13  1  0      
 13 14  1  0      
 14 10  1  0      
 11 15  2  0      
 15 16  1  0      
 16 17  1  0      
 17 12  2  0      
  5 18  1  0      
  3 19  1  0      
  3 20  1  0      
  2 21  1  0      
  1 22  2  0      
  9 23  1  0      
 23 24  1  0      
M  STY  1   1 SUP
M  SLB  1   1   1
M  SAL   1  2  23  24
M  SBL   1  1  26
M  SMT   1 CH2OH
M  SBV   1 26   -6.0045    4.0285
M  END
$$$$
