# Supplementary material for: Spongiatriol Inhibits Nuclear Factor Kappa B Activation and Induces Apoptosis in Pancreatic Cancer Cells
Source: MDPI journal article supplement (doi:10.3390/md11041140), 2013-04-02
Supplement: s2 [file s2]

marinedrugs-11-01140-s001.mol
  ChemDraw03101420532D

 24 27  0  0  0  0  0  0  0  0999 V2000
   -2.0637    0.1510    0.0000 C   0  0  0  0  0  0  0  0  0  0  0  0
   -2.0637   -0.6740    0.0000 C   0  0  0  0  0  0  0  0  0  0  0  0
   -1.3492   -1.0865    0.0000 C   0  0  0  0  0  0  0  0  0  0  0  0
   -0.6348   -0.6740    0.0000 C   0  0  0  0  0  0  0  0  0  0  0  0
   -0.6348    0.1510    0.0000 C   0  0  0  0  0  0  0  0  0  0  0  0
   -1.3492    0.5635    0.0000 C   0  0  0  0  0  0  0  0  0  0  0  0
    0.0797   -1.0865    0.0000 C   0  0  0  0  0  0  0  0  0  0  0  0
    0.7942   -0.6740    0.0000 C   0  0  0  0  0  0  0  0  0  0  0  0
    0.7942    0.1510    0.0000 C   0  0  0  0  0  0  0  0  0  0  0  0
    0.0797    0.5635    0.0000 C   0  0  0  0  0  0  0  0  0  0  0  0
    1.5086    0.5635    0.0000 C   0  0  0  0  0  0  0  0  0  0  0  0
    1.5086    1.3885    0.0000 C   0  0  0  0  0  0  0  0  0  0  0  0
    0.7942    1.8010    0.0000 C   0  0  0  0  0  0  0  0  0  0  0  0
    0.0797    1.3885    0.0000 C   0  0  0  0  0  0  0  0  0  0  0  0
    2.2933    0.3085    0.0000 C   0  0  0  0  0  0  0  0  0  0  0  0
    2.7782    0.9760    0.0000 O   0  0  0  0  0  0  0  0  0  0  0  0
    2.2933    1.6434    0.0000 C   0  0  0  0  0  0  0  0  0  0  0  0
   -0.6348    0.9760    0.0000 C   0  0  0  0  0  0  0  0  0  0  0  0
   -0.9367   -1.8010    0.0000 O   0  0  0  0  0  0  0  0  0  0  0  0
   -1.7617   -1.8010    0.0000 C   0  0  0  0  0  0  0  0  0  0  0  0
   -2.7782   -1.0865    0.0000 O   0  0  0  0  0  0  0  0  0  0  0  0
   -2.7782    0.5635    0.0000 O   0  0  0  0  0  0  0  0  0  0  0  0
    1.1508   -0.0553    0.0000 C   0  0  0  0  0  0  0  0  0  0  0  0
    1.8652   -0.4678    0.0000 O   0  0  0  0  0  0  0  0  0  0  0  0
  1  2  1  0      
  2  3  1  0      
  3  4  1  0      
  4  5  1  0      
  5  6  1  0      
  6  1  1  0      
  4  7  1  0      
  7  8  1  0      
  8  9  1  0      
  9 10  1  0      
 10  5  1  0      
  9 11  1  0      
 11 12  1  0      
 12 13  1  0      
 13 14  1  0      
 14 10  1  0      
 11 15  2  0      
 15 16  1  0      
 16 17  1  0      
 17 12  2  0      
  5 18  1  1      
  3 19  1  1      
  3 20  1  6      
  2 21  1  6      
  1 22  2  0      
  9 23  1  1      
 23 24  1  0      
M  STY  1   1 SUP
M  SLB  1   1   1
M  SAL   1  2  23  24
M  SBL   1  1  26
M  SMT   1 CH2OH
M  SBV   1 26   -6.0045    4.0285
M  END
